# Supplementary material for: Reaction control in heterogeneous catalysis using montmorillonite: switching between acid-catalysed and red-ox processes
Source: Royal Society of Chemistry journal article supplement (doi:10.1039/c6ra05293b), 2016-01-01
Supplement: c6ra05293b1.pdf [file c6ra05293b1.pdf]

## Supporting Information

### Reaction control in heterogeneous catalysis using montmorillonite: Switching between acid-catalysed and red-ox processes

José Antonio Morales-Serna,<sup>\*a</sup> Bernardo A. Frontana-Uribe,<sup>b,c</sup> Rosario Olguín,<sup>c</sup> Virginia Gómez-Vidales,<sup>c</sup> Leticia Lomas-Romero,<sup>a</sup> Erendira García-Ríos,<sup>c</sup> Ruben Gaviño,<sup>c</sup> Jorge Cárdenas<sup>\*c</sup>

<sup>a</sup> *Departamento de Química, Universidad Autónoma Metropolitana, Av. San Rafael Atlixco No.186, Ciudad de México 09340, México. Fax: +52 55 5318900; Tel: +52 55 5318 9593; E-mail: [joseantonio.moralesserna@xanum.uam.mx](mailto:joseantonio.moralesserna@xanum.uam.mx) (JAMS).*

<sup>b</sup> *Centro Conjunto de Investigación en Química Sustentable, UAEM-UNAM, Carretera Toluca-Ixtlahuaca Km 14.5, C.P. 50200 Toluca, Estado de México, México.*

<sup>c</sup> *Instituto de Química, Universidad Nacional Autónoma de México, Circuito Exterior, Ciudad Universitaria, Ciudad de México 04510, México. Fax: +52 55 5616 2217; Tel: +52 55 56224413; E-mail: [rjcp@unam.mx](mailto:rjcp@unam.mx) (JC).*

#### Table of Contents

|                            |    |
|----------------------------|----|
| 1. General methods         | S1 |
| 2. Experimental procedures | S1 |
| 3. Characterization data   | S3 |
| 4. References              | S6 |

## 1. General methods

All the chemicals were purchased from Aldrich Chemical Co and used without further purification unless stated otherwise. Yields refer to the chromatographically and spectroscopically ( $^1\text{H}$  and  $^{13}\text{C}$ ) homogeneous materials, unless otherwise stated. All glassware utilized was flame-dried before use. Reactions were monitored by TLC carried out on 0.25 mm Macherey Nagel silica gel plates. Developed TLC plates were visualized under a short-wave UV lamp and by heating plates that were dipped in  $\text{Ce}(\text{SO}_4)_2$ . Flash column chromatography (FCC) was performed using flash silica gel (230–400) and employed a solvent polarity correlated with TLC mobility. NMR experiments were conducted on a Varian Unity and Bruker Avance 300 MHz instruments using  $\text{CDCl}_3$  (99.9% D) as the solvent, with chemical shifts ( $\delta$ ) referenced to internal standards residual  $\text{CHCl}_3$  and  $\text{CDCl}_3$ , (7.26 ppm  $^1\text{H}$ , 77.0 ppm  $^{13}\text{C}$ ) or  $\text{Me}_4\text{Si}$  as an internal reference (0.00 ppm). Chemical shifts are in parts per million (ppm). Mass spectra were recorded on Jeol JS102 high-resolution mass spectrometer. The measurements of EPR were made with a Jeol JES-TE300 X band fashion spectrometer with a cylindrical cavity in the mode  $\text{TE}_{011}$ . The external calibration of the magnetic field was made with a precision gaussmeter, Jeol ES-FC5.

## 2. Experimental procedures

### ***Preparation of modified montmorillonite***

The natural montmorillonite sample was the same as we described previously.<sup>1</sup> Modification and characterization of montmorillonite with  $\text{CF}_3\text{SO}_3\text{H}$  was realized according to the method previously reported.<sup>1</sup>

### ***General procedure for the synthesis of tetrasubstituted furans***

A solution of hydroquinone (50% mmol) and modified montmorillonite (20%w) in anhydrous benzene (30 mL) was deoxygenated under an argon atmosphere. Then a solution of  $\alpha$ -hydroxyl ketones **1** (1 mmol) in deoxygenated benzene (5 mL) was added at room temperature. The reaction mixture was stirred for 12 h at reflux under argon atmosphere. After that time, the reaction mixture was filtered and concentrated in vacuum. The resulting residue was purified by flash column chromatography on silica gel.

**General procedure for the synthesis of 1,2-diketones**

A solution of  $\alpha$ -hydroxyl ketones **1** (1 mmol) and modified montmorillonite (20%w) in anhydrous benzene (30 mL) was stirred for 6 h at reflux under argon atmosphere. After that time, the reaction mixture was filtered and concentrated in vacuum. The resulting residue was purified by flash column chromatography on silica gel.

**Reuse of the catalyst**

When the organic reactions were complete, the montmorillonite catalyst was removed by filtration, washed with ethyl acetate, dried overnight in an oven at 100 °C, and subjected to a second experimental run with the same substrate. After the completion of four runs, results indicated no significant variation in yield.

**EPR analysis**

A tube was prepared adding 40 mg of the modified montmorillonite and dried at 70 °C under vacuum; the tube was analyzed by EPR (Figure **S1A**). Then 2 mL of anhydrous benzene were added and the sample was analyzed (Figure **S1B**). The last experiment was carried out after adding benzoine to the tube, scanning every 5 minutes (Figure **S1C**).

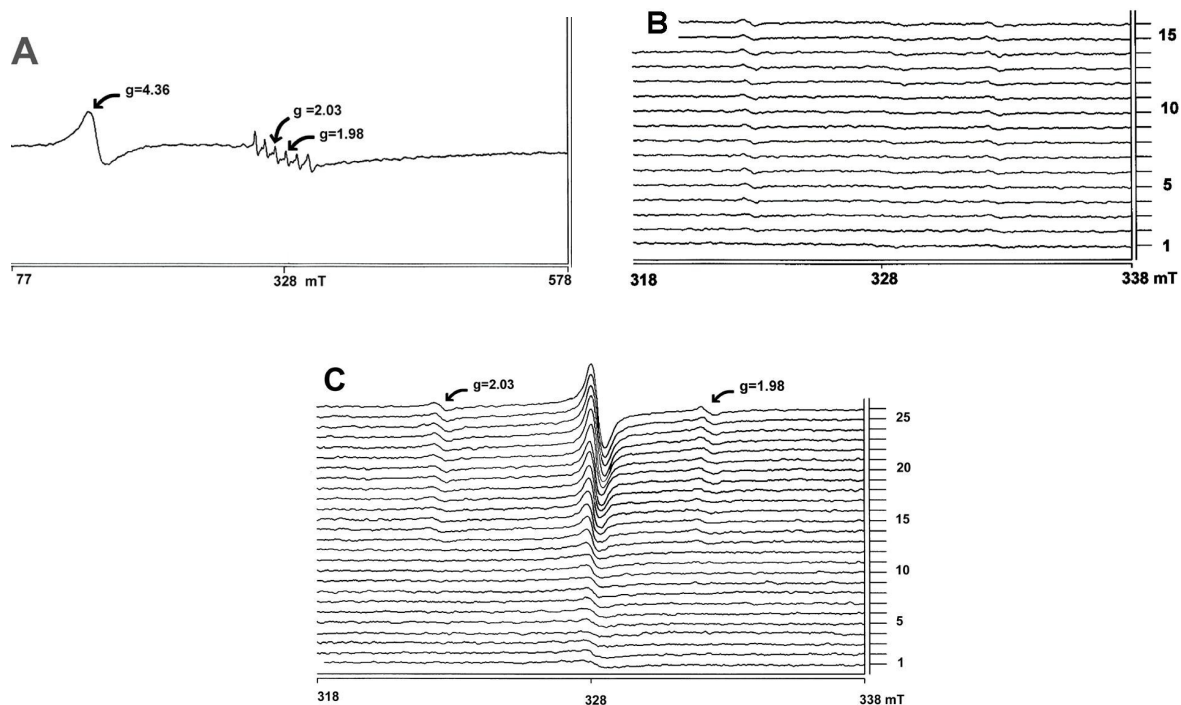**Figure S1**

### 3. Characterization data

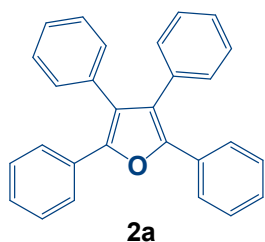

**2,3,4,5-tetraphenylfuran 2a:**<sup>2</sup> Following the general procedure for the synthesis of tetrasubstituted furans, the reaction was carried out starting from benzoin **1a** (212 mg, 1 mmol), hydroquinone (55 mg, 0.5 mmol) and modified montmorillonite (42 mg), to give 111 mg of a white solid (60%, mp 173-174 °C); <sup>1</sup>H NMR (CDCl<sub>3</sub>): δ 7.51-7.49 (m, 4H), 7.26-7.20 (m, 12H), 7.16-12.13 (m, 4H); <sup>13</sup>C NMR (CDCl<sub>3</sub>): δ 147.7, 133.1, 130.9, 130.4, 128.5, 128.3, 127.3, 127.1, 125.8, 125.1. HRMS (FAB) calcd for C<sub>28</sub>H<sub>20</sub>O 372.1514, found 372.1518.

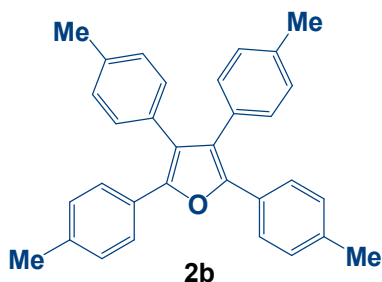

**2,3,4,5-tetra-*p*-tolylfuran 2b:**<sup>2</sup> Following the general procedure for the synthesis of tetrasubstituted furans, the reaction was carried out starting from benzoin **1b** (240 mg, 1 mmol), hydroquinone (55 mg, 0.5 mmol) and modified montmorillonite (48 mg), to give 133 mg of a white solid (62%, mp 185-186 °C); <sup>1</sup>H NMR (CDCl<sub>3</sub>): δ 7.37 (d, *J* = 8.4 Hz, 4H), 7.04 (d, *J* = 8.0 Hz, 4H), 7.02 (s, 8H), 2.36 (s, 12H); <sup>13</sup>C NMR (CDCl<sub>3</sub>): δ 147.5, 136.9, 136.5, 130.3, 130.2, 129.0, 128.7, 128.4, 125.8, 124.3, 29.7, 21.3. HRMS (FAB) calcd for C<sub>32</sub>H<sub>28</sub>O 428.2141, found 428.2139.

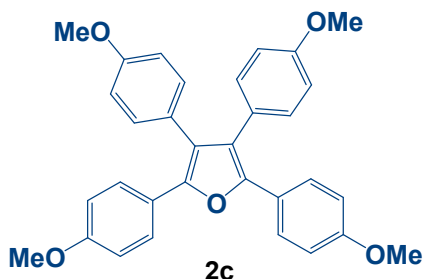

**2,3,4,5-tetrakis(4-methoxyphenyl)furan 2c:**<sup>3</sup> Following the general procedure for the synthesis of tetrasubstituted furans, the reaction was carried out starting from benzoin **1c** (272 mg, 1 mmol), hydroquinone (55 mg, 0.5 mmol) and modified montmorillonite (54 mg), to give 160 mg of a white solid (65%, mp 207-209 °C); <sup>1</sup>H NMR (CDCl<sub>3</sub>): δ 7.42 (d, *J* = 8.8 Hz, 4 H), 7.04 (d, *J* = 8.8 Hz, 4 H), 6.79 (d, *J* = 8.2 Hz, 4 H), 6.77 (d, *J* = 8.4 Hz, 4 H), 3.78 (s, 12H); <sup>13</sup>C NMR (CDCl<sub>3</sub>): δ 147.7, 133.1, 130.9, 130.4, 128.5, 128.3, 127.3, 127.1, 125.8, 125.1, 55.1, 55.0. HRMS (FAB) calcd for C<sub>32</sub>H<sub>28</sub>O<sub>5</sub> 492.1937, found 492.1941.

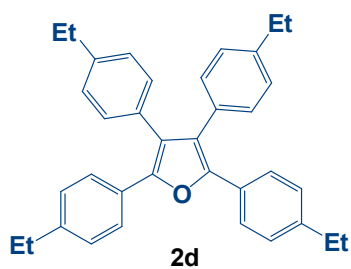

**2,3,4,5-tetrakis(4-ethylphenyl)furan 2c:**<sup>4</sup> Following the general procedure for the synthesis of tetrasubstituted furans, the reaction was carried out starting from benzoin **1d** (268 mg, 1 mmol), hydroquinone (55 mg, 0.5 mmol) and modified montmorillonite (52 mg), to give 157 mg of a white solid (65%, mp 194-196 °C); <sup>1</sup>H NMR (CDCl<sub>3</sub>): δ 7.35 (d, *J* = 8.2 Hz, 4 H), 7.03-6.89 (m, 12H), 2.58-2.51 (m, 8H), 1.16 (t, *J* = 7.6 Hz, 6H), 1.15 (t, *J* = 7.6 Hz, 6H); <sup>13</sup>C NMR (CDCl<sub>3</sub>): δ 145.5, 143.2, 142.7, 130.6, 130.3, 128.7, 127.8, 127.7, 125.8, 124.4, 28.6, 28.5, 15.3, 15.1. HRMS (FAB) calcd for C<sub>36</sub>H<sub>36</sub>O 484.2766, found 484.2769.

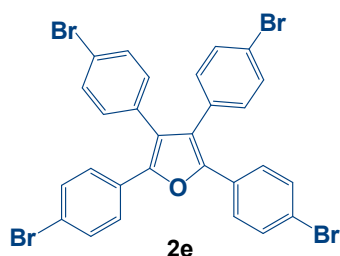

**2,3,4,5-tetrakis(4-bromophenyl)furan 2e:**<sup>2</sup> Following the general procedure for the synthesis of tetrasubstituted furans, the reaction was carried out starting from benzoin **1e** (368 mg, 1 mmol), hydroquinone (55 mg, 0.5 mmol) and modified montmorillonite (72 mg), to give 205 mg of a white solid (60%, mp 165-167 °C); <sup>1</sup>H NMR (CDCl<sub>3</sub>): δ 7.42 (d, *J* = 8.0 Hz, 8 H), 7.32 (d, *J* = 8.0 Hz, 4 H), 6.98 (d, *J* = 8.0 Hz, 4 H); <sup>13</sup>C NMR (CDCl<sub>3</sub>): δ 147.3, 131.9, 131.7, 131.1, 128.9, 127.3, 121.9, 121.8 HRMS (FAB) calcd for C<sub>28</sub>H<sub>16</sub>BrO 683.7935, found 683.7939.

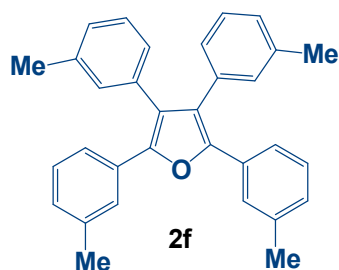

**2,3,4,5-tetra-*m*-tolylfuran:**<sup>2</sup> Following the general procedure for the synthesis of tetrasubstituted furans, the reaction was carried out starting from benzoin **1f** (240 mg, 1 mmol), hydroquinone (55 mg, 0.5 mmol) and modified montmorillonite (48 mg), to give 128 mg of a white solid (60%, mp 100-102 °C); <sup>1</sup>H NMR (CDCl<sub>3</sub>): δ 7.41 (s, 2 H), 7.25 (d, *J* = 5.6 Hz, 2 H), 7.12 (t, *J* = 7.6 Hz, 4 H), 7.04-6.94 (m, 8 H), 2.30 (s, 6 H), 2.23 (s, 6 H); <sup>13</sup>C NMR (CDCl<sub>3</sub>): δ 147.6, 137.9, 137.7, 133.2, 131.1, 128.1, 127.8, 127.5, 126.4, 125.1, 123.1, 21.5, 21.3. HRMS (FAB) calcd for C<sub>32</sub>H<sub>28</sub>O 428.2140, found 428.2145.

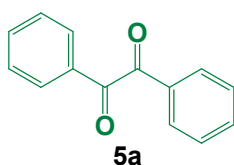

**Benzil 5a:**<sup>5</sup> Following the general procedure for the synthesis of 1,2-diketones, the reaction was carried out starting from benzoin **1a** (212 mg, 1 mmol) and modified montmorillonite (42 mg), to give 199 mg of a white solid (95%, mp 92-94 °C); <sup>1</sup>H NMR (CDCl<sub>3</sub>): δ 8.01-7.94 (m, 4H), 7.70-7.64 (m, 2H), 7.56-7.50 (m, 4H); <sup>13</sup>C NMR (CDCl<sub>3</sub>): δ 194.6, 134.9, 133.0, 129.9, 129.0. HRMS (FAB) calcd for C<sub>14</sub>H<sub>10</sub>O<sub>2</sub> 210.0681, found 210.0682.

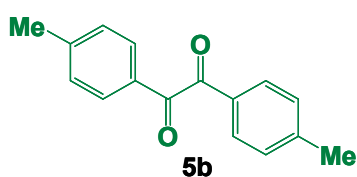

**Benzil 5b:**<sup>5</sup> Following the general procedure for the synthesis of 1,2-diketones, the reaction was carried out starting from benzoin **1b** (240 mg, 1 mmol) and modified montmorillonite (48 mg), to give 226 mg of a white solid (95%, mp 102-104 °C); <sup>1</sup>H NMR (CDCl<sub>3</sub>): δ 7.68 (d, *J* = 8 Hz, 4H), 7.28 (d, *J* = 8 Hz, 4H), 2.40 (s, 6H); <sup>13</sup>C NMR (CDCl<sub>3</sub>): δ 194.6, 146.2, 130.9, 130.1, 129.8, 22.0. HRMS (FAB) calcd for C<sub>16</sub>H<sub>14</sub>O<sub>2</sub> 238.0994, found 238.0996.

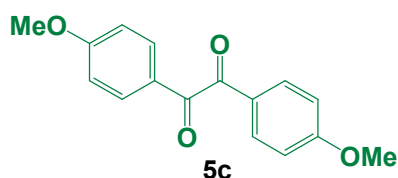

**Benzil 5c:**<sup>5</sup> Following the general procedure for the synthesis of 1,2-diketones, the reaction was carried out starting from benzoin **1c** (272 mg, 1 mmol) and modified montmorillonite (54 mg), to give 256 mg of a white solid (95%, mp 131-133 °C); <sup>1</sup>H NMR (CDCl<sub>3</sub>): δ 7.69 (d, *J* = 8 Hz, 4H), 6.92 (d, *J* = 8 Hz, 4H), 3.88 (s, 6H); <sup>13</sup>C NMR (CDCl<sub>3</sub>): δ 193.6, 165.0, 132.5, 126.5, 114.4, 55.8. HRMS (FAB) calcd for C<sub>16</sub>H<sub>14</sub>O<sub>4</sub> 270.0892, found 270.0893.

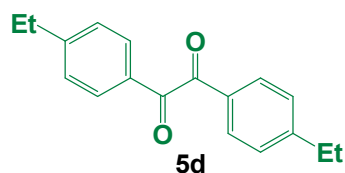

**Benzil 5d:**<sup>5</sup> Following the general procedure for the synthesis of 1,2-diketones, the reaction was carried out starting from benzoin **1d** (268 mg, 1 mmol) and modified montmorillonite (52 mg), to give 253 mg of a white solid (95%, mp 122-124 °C); <sup>1</sup>H NMR (CDCl<sub>3</sub>): δ 7.80 (d, *J* = 8 Hz, 4H), 7.23 (d, *J* = 8 Hz, 4H), 2.62 (q, *J* = 7.6 Hz, 4H), 1.15 (t, *J* = 7.6 Hz, 6H); <sup>13</sup>C

NMR (CDCl<sub>3</sub>):  $\delta$  194.7, 152.3, 130.9, 130.2, 128.6, 29.3, 15.2. HRMS (FAB) calcd for C<sub>18</sub>H<sub>18</sub>O<sub>2</sub> 266.1307, found 266.1309.

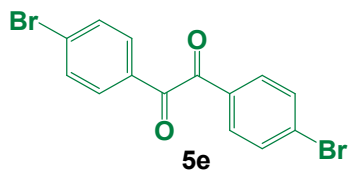

**Benzil 5e:**<sup>5</sup> Following the general procedure for the synthesis of 1,2-diketones, the reaction was carried out starting from benzoin **1e** (368 mg, 1 mmol) and modified montmorillonite (72 mg), to give 328 mg of a white solid (90%, mp 223-225 °C); <sup>1</sup>H NMR (CDCl<sub>3</sub>):  $\delta$  7.83 (d,  $J$  = 8 Hz, 4H), 7.67 (d,  $J$  = 8 Hz, 4H); <sup>13</sup>C NMR (CDCl<sub>3</sub>):  $\delta$  192.7, 132.7,

131.7, 131.4, 130.9. HRMS (FAB) calcd for C<sub>14</sub>H<sub>8</sub>Br<sub>2</sub>O<sub>2</sub> 365.8891, found 365.8893.

**Benzil 5f:**<sup>5</sup> Following the general procedure for the synthesis of 1,2-diketones, the reaction was carried out starting from benzoin **1f** (240 mg, 1

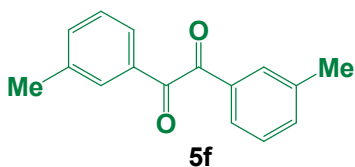

mmol) and modified montmorillonite (48 mg), to give 226 mg of a white solid (95%, mp 125-127 °C); <sup>1</sup>H NMR (CDCl<sub>3</sub>):  $\delta$  7.82-7.73 (m, 4H), 7.47 (d,  $J$  = 7.6 Hz, 2H), 7.39 (t,  $J$  = 7.6 Hz, 2H), 2.40 (s, 6H); <sup>13</sup>C NMR (CDCl<sub>3</sub>):  $\delta$  195.1,

139.1, 135.8, 133.2, 130.4, 129.0, 127.4, 21.4. HRMS (FAB) calcd for C<sub>16</sub>H<sub>14</sub>O<sub>2</sub> 238.0994, found 238.0998.

#### 4. References

- 
- <sup>1</sup> (a) G. Granados-Oliveros, V.; Gómez-Vidales, A.; Nieto-Camacho, J. A.; Morales-Serna, J. Cárdenas, and M. Salmón. *RSC Adv.*, 2013, **3**, 937; (b) R. Y. M. Vargas, H. I. Beltrán, V. E. Labastida, L. C. López and M. Salmón, *J. Mater. Res.*, 2007, **22**, 788.
- <sup>2</sup>(a) L. Wang, Jun Li, Y. Lv, G. Zhao and S. Gao, *Synlett*, 2012, **23**, 1074, (b) Y. Wen, S. Zhu, H. Jiang, A. Wang and Z. Chen, *Synlett*, 2011, 1023; (c) A. Wang, H. Jiang and Q. Xu, *Synlett*, 2009, 929.
- <sup>3</sup> M. Nakano, H. Tsurugi, T. Satoh and M. Miura, *Org. Lett.*, 2008, **10**, 1851.
- <sup>4</sup> M. Hussain, R. A. Khera, N. T. Hung and P. Langer, *Org. Biomol. Chem.*, 2011, **9**, 370.
- <sup>5</sup> (a) Z., Zhishuo and Z. Xiaosong, *Chin. J. Chem.* 2012, **30**, 1683; (b) J.-D. Lou, Y.-C. Ma, N. Vatanian, Q. Wang and C. Zhang, *Synth. React. Inorg., Met.-Org., Nano-Met. Chem.*, 2010, **40**, 157; (c) J.-D. Lou a, L. Li, N. Vatanian, X L. Lu and X. Yu, *Synth. React. Inorg., Met.-Org., Nano-Met. Chem.*, 2008, **38**, 373.
